# Supplementary material for: Photoionization-induced π ↔ H site switching dynamics in phenol+–Rg (Rg = Ar, Kr) dimers probed by picosecond time-resolved infrared spectroscopy
Source: Royal Society of Chemistry journal article supplement (doi:10.1039/c6cp05016f), 2016-01-01
Supplement: c6cp05016f1.pdf [file c6cp05016f1.pdf]

### Electronic Supplementary Information

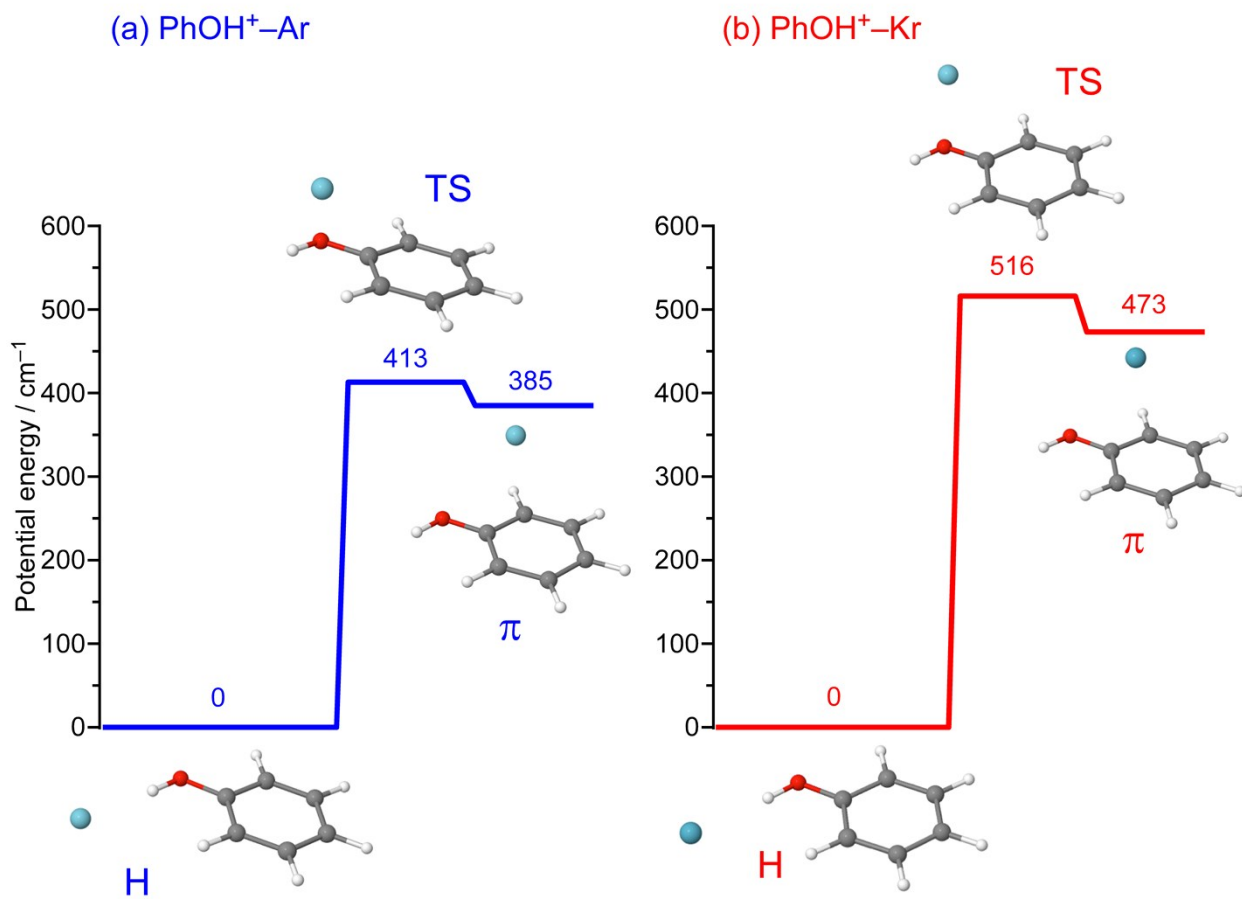

**Figure S1** Potential energy diagrams of (a) PhOH<sup>+</sup>-Ar and (b) PhOH<sup>+</sup>-Kr calculated at the B3LYP-D3/aug-cc-pVTZ level of theory. Energies are not corrected for zero-point energies and basis set superposition errors.

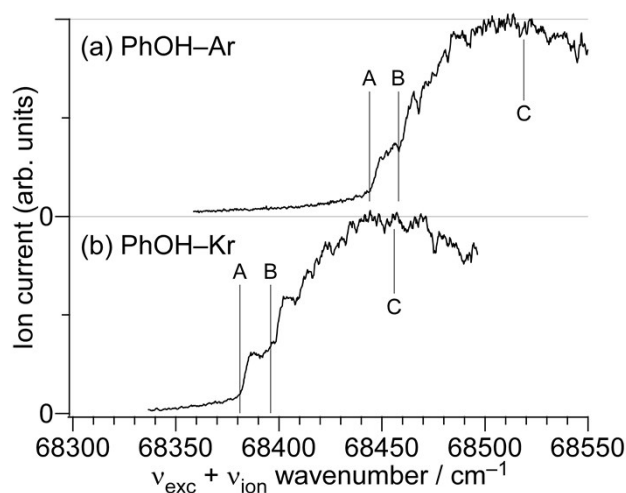

**Figure S2** Photoionization efficiency curves of PhOH-Ar and PhOH-Kr clusters used for estimation of the amount of the direct ionization components measured by nanosecond lasers. Lines labeled A, B, and C show positions at which ionization efficiencies are evaluated; A: direct ionization to the H-bound isomer, B: vibrational ground level of the  $\pi$ -bound isomer, and C: the excess energy used in the time-resolved measurements, respectively.
